# Supplementary material for: Ralstonia solanacearum Type III Effectors with Predicted Nuclear Localization Signal Localize to Various Cell Compartments and Modulate Immune Responses in Nicotiana spp
Source: PubMed Central journal article supplement — Plant Pathol J. 2020 Feb 1;36(1):43–53. doi: 10.5423/PPJ.OA.08.2019.0227 (PMC7012579; doi:10.5423/ppj.oa.08.2019.0227), 2020-02-01
Supplement: PPJ-36-043_Supple.pdf [file PPJ-36-043_Supple.pdf]

**Supplementary Table 1.** Primers used in this study

| Gene              | Sequence (5' → 3')                       |                                         |
|-------------------|------------------------------------------|-----------------------------------------|
|                   | Forward                                  | Reverse                                 |
| RipA1-mod1        | GGTCTCAAATGTCGATTGGCAGATCAAAGTC          | GGTCTCAGCGCGTTGCCAGGATCTG               |
| RipA1-mod2        | GGTCTCAGCGCTGGCGATCAAGGCA                | GGTCTCATTGGCCATCCCCTCCTGG               |
| RipA1-mod3        | GGTCTACCAATGTCGGGGTGTCCG                 | GGTCTCACGAATTCGGGAGACAGACCAGCA          |
| RipAB             | GGTCTCAAATGAGCCACAGCAAATCAAGGC           | GGTCTCACGAAGTCGTCGTCGTCCTTGATCTTC       |
| RipAD             | GGTCTCAAATGTTGAAAATAGGCCGTATCAC          | GGTCTCACGAACCAGTCGAGCTGCGGATC           |
| RipAF1            | GGTCTCAAATGGGTTTGCCACGGATCC              | GGTCTCACGAATCGCGTTGATGTGGATGCC          |
| RipAO             | GGTCTCAAATGGCGGGTCCCCTACTGCTCA           | GGTCTCACGAAGCGGTACCCATTCTGCTGCTT        |
| RipD-mod1         | GGTCTCAAATGGGAAATTTACAGATTAAGC-GAGCTCTGC | GGTCTCACGTAAGGCCCATGTGTTAAGCCC          |
| RipD-mod2         | GGTCTCATAACGGCTAAAGAGTACATCCTG           | GGTCTCACGAAGACGCGATCATAGTCGATC          |
| RipE1             | GGTCTCAAATGCCGCCGCTCTGCCGTCGAT           | GGTCTCACGAAGCTTTCTGTGGCGGGCGGCT-CACCTTT |
| RipL-mod1         | GGTCTCAAATGTGGCGTTCAAACATCGGT            | GGTCTCAGGCAAGAACGCGTCCTTCA              |
| RipL-mod2         | GGTCTCATGCCCGGAAGCGAAAACG                | GGTCTCACAGGGCCGGCTTCAATGC               |
| RipL-mod3         | GGTCTCACCTGCACGCGTTCTCGAC                | GGTCTCACGAACTTTGCTTTGCCCTTGCCC          |
| <i>AtLDIP</i>     | GGTCTCAAATGGCTACTCAAACGGATCTCGCT         | GGTCTCACGAAATCAAGTGGATGGAACCTCAA        |
| <i>NbActin</i>    | GATGAAGATACTCACAGAAAGA                   | GTGGTTTCATGAATGCCAGCA                   |
| <i>NbSGT1</i>     | TAATGTGTCATCAGATGCC                      | ACTTCTTTCCAGTTTGTGCGAC                  |
| <i>NbCYP71D20</i> | AAGGTCCACCGCACCATGTCCTTAGAG              | AAGAATTCCTTGCCCCTTGAGTACTTGC            |
| <i>NbACRE31</i>   | AAGGTCCCGTCTTCGTCGGATCTTCG               | AAGAATTCGGCCATCGTGATCTTGGTC             |
| <i>NbACRE132</i>  | AAGGTCCAGCGAAGTCTCTGAGGGTGA              | AAGAATTCCAATCCTAGCTCTGGCTCCTG           |

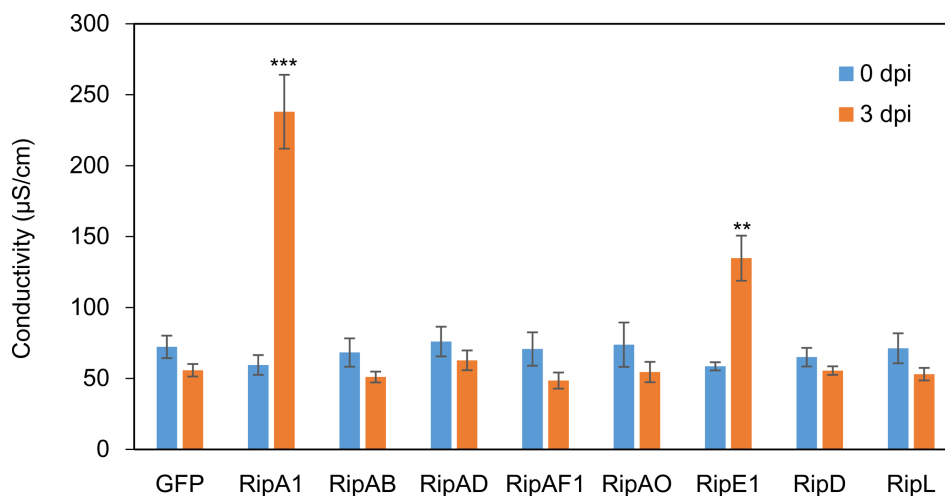

**Supplementary Fig. 1.** Quantification of effector-induced cell death by electrolyte leakage assay. Conductivity in *Nicotiana benthamiana* leaf discs expressing each effector or GFP control was measured at 0 and 3 dpi. Data are presented as mean  $\pm$  standard error of mean ( $n = 4$ ). Statistical significance compared to GFP-expressing leaf is indicated by asterisks (Student's  $t$ -test, \*\* $P < 0.05$ , \*\*\* $P < 0.01$ ). This experiment was repeated more than three times with similar results. dpi, days post infiltration.

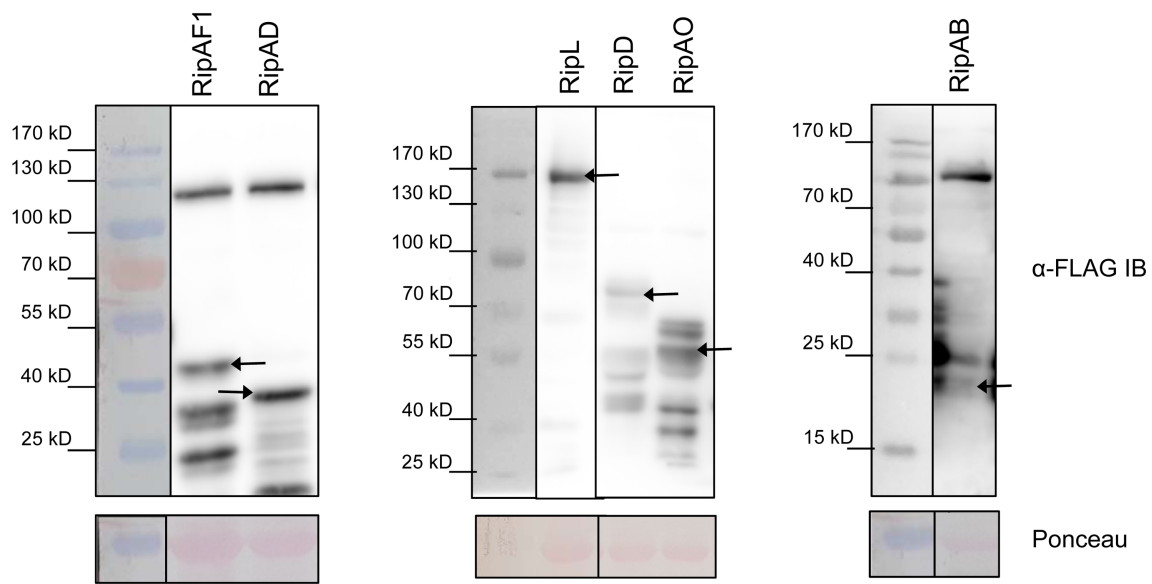

**Supplementary Fig. 2.** Detection of the 3×FLAG-tagged effector proteins. *Nicotiana benthamiana* leaf tissues infiltrated with *Agrobacterium tumefaciens* AGL1 strain carrying 3×FLAG-tagged effector construct were harvested at 1 dpi. Proteins were extracted from the samples and the effector protein expression was monitored by western blot with anti-FLAG antibody. Correct protein bands of predicted effector size are indicated with black arrows. Ponceau red staining is shown as a loading control. dpi, days post infiltration.

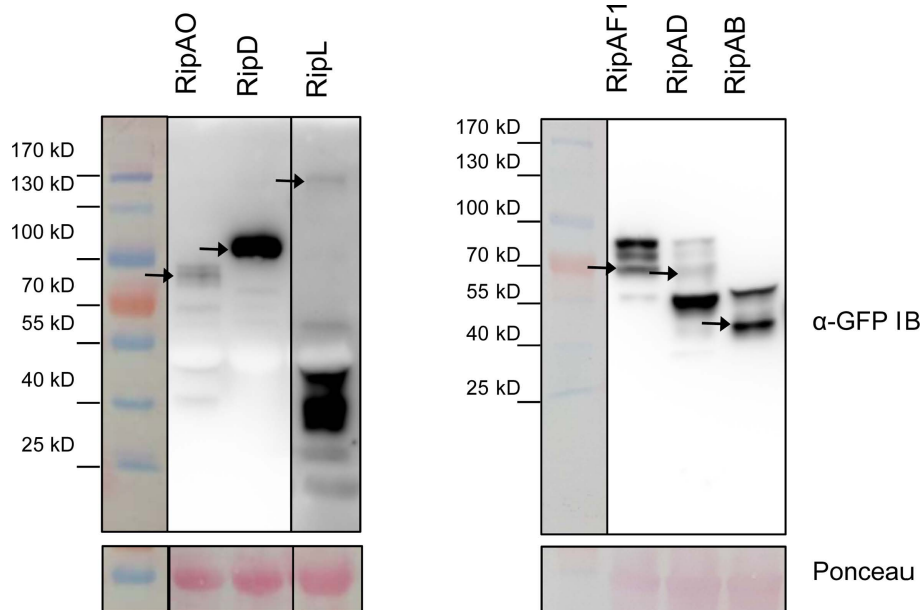

**Supplementary Fig. 3.** Detection of the YFP-tagged effector proteins. *Nicotiana benthamiana* leaf tissues infiltrated with *Agrobacterium tumefaciens* AGL1 strain carrying 3×FLAG-tagged effector construct were harvested at 1 dpi. Proteins were extracted from the samples and the effector protein expression was monitored by western blot with anti-FLAG antibody. Correct protein bands of predicted effector size are indicated with black arrows. Ponceau red staining is shown as a loading control. dpi, days post infiltration.
